# Supplementary material for: Radioactive Iodine Treatment and the Risk of Long-Term Cardiovascular Morbidity and Mortality in Thyroid Cancer Patients: A Nationwide Cohort Study
Source: MDPI journal article supplement (doi:10.3390/jcm10174032), 2021-09-06
Supplement: s1 [file s1]

**Table S1.** Characteristics of the control and study groups at the end of study.

| Variables              |         | RAI group   |      | Non-RAI group |      | P     |
|------------------------|---------|-------------|------|---------------|------|-------|
|                        |         | n           | %    | n             | %    |       |
|                        | Total   | 11,889      | 89.3 | 1,421         | 10.7 |       |
| CVD                    | Without | 10,485      | 88.2 | 1,257         | 88.5 | 0.40  |
|                        | With    | 1,404       | 11.8 | 164           | 11.5 |       |
| CVD-specific mortality | Without | 11,690      | 98.2 | 1,393         | 98.0 | 0.32  |
|                        | With    | 209         | 1.8  | 28            | 2.0  |       |
| Gender                 | Male    | 2,259       | 19.0 | 289           | 20.3 | 0.12  |
|                        | Female  | 9,630       | 81.0 | 1,132         | 79.7 |       |
| Age (years)            |         | 50.0 ± 14.5 |      | 49.7 ± 14.4   |      | 0.39  |
| Age groups (yrs)       | 20-39   | 3,220       | 27.1 | 390           | 27.5 | 0.84  |
|                        | 40-59   | 5,895       | 49.6 | 715           | 50.3 |       |
|                        | 60-79   | 2,392       | 20.1 | 272           | 19.1 |       |
|                        | ≥ 80    | 382         | 3.2  | 44            | 3.1  |       |
| DM                     | Without | 10,923      | 91.9 | 1,330         | 93.6 | 0.01  |
|                        | With    | 966         | 8.1  | 91            | 6.4  |       |
| CKD                    | Without | 11,678      | 98.2 | 1,401         | 98.6 | 0.19  |
|                        | With    | 211         | 1.8  | 20            | 1.4  |       |
| Hyperlipidemia         | Without | 11,614      | 97.7 | 1,396         | 98.2 | 0.11  |
|                        | With    | 275         | 2.3  | 25            | 1.8  |       |
| CCI_R                  |         | 0.13 ± 0.39 |      | 0.10 ± 0.34   |      | 0.002 |

P: Chi-square / Fisher exact test on category variables and t-test on continue variables

RAI=radioactive iodine; CVD: cardiovascular disease; DM=diabetes mellitus; CKD=chronic kidney disease;

CCI\_R=Charlson comorbidity index after removal of the above mentioned comorbidities and myocardial injury,

chronic heart failure, peripheral vascular diseases, cerebrovascular diseases or transient ischemic attack and

hemiplegia

**Table S2.** Detail numbers in each year of Kaplan-Meier plots for the cumulative risk of CVD and cumulative

survival of CVD-specific mortality stratified by radioiodine (RAI) with log-rank test.

| In the tracking<br>of x year(s) | Numbers of CVD           |                            |                      | Numbers of CVD-specific mortality |                            |                      |
|---------------------------------|--------------------------|----------------------------|----------------------|-----------------------------------|----------------------------|----------------------|
|                                 | With RAI<br>(n = 11,889) | Without RAI<br>(n = 1,421) | Log-rank<br><i>P</i> | With RAI<br>(n = 11,889)          | Without RAI<br>(n = 1,421) | Log-rank<br><i>P</i> |
| <b>1</b>                        | 299                      | 35                         | 0.620                | 27                                | 1                          | 0.215                |
| <b>2</b>                        | 556                      | 62                         | 0.387                | 63                                | 9                          | 0.800                |
| <b>3</b>                        | 779                      | 93                         | 0.515                | 88                                | 14                         | 0.369                |
| <b>4</b>                        | 945                      | 115                        | 0.531                | 108                               | 19                         | 0.156                |
| <b>5</b>                        | 1,060                    | 123                        | 0.462                | 132                               | 20                         | 0.163                |
| <b>6</b>                        | 1,140                    | 130                        | 0.654                | 152                               | 20                         | 0.507                |
| <b>7</b>                        | 1,202                    | 142                        | 0.410                | 158                               | 22                         | 0.333                |
| <b>8</b>                        | 1,241                    | 143                        | 0.457                | 162                               | 22                         | 0.371                |
| <b>9</b>                        | 1,285                    | 146                        | 0.576                | 172                               | 23                         | 0.391                |
| <b>10</b>                       | 1,317                    | 151                        | 0.599                | 182                               | 27                         | 0.166                |
| <b>11</b>                       | 1,344                    | 154                        | 0.817                | 188                               | 27                         | 0.275                |
| <b>12</b>                       | 1,370                    | 157                        | 0.943                | 196                               | 28                         | 0.281                |
| <b>13</b>                       | 1,386                    | 159                        | 0.819                | 202                               | 28                         | 0.473                |
| <b>14</b>                       | 1,398                    | 161                        | 0.748                | 206                               | 28                         | 0.544                |
| <b>15</b>                       | 1,403                    | 164                        | 0.586                | 209                               | 28                         | 0.657                |
| <b>16</b>                       | 1,404                    | 164                        | 0.716                | 209                               | 28                         | 0.623                |

RAI=radioactive iodine; CVD=cardiovascular disease;

**Table S3.** Factors of CVD stratified by variables listed in the table by using Cox regression

|                         | RAI group |           |           | Non-RAI group |          |           | RAI vs. non-RAI ( <i>Reference</i> ) |             |           |      |
|-------------------------|-----------|-----------|-----------|---------------|----------|-----------|--------------------------------------|-------------|-----------|------|
| Stratified              | Events    | PYs       | Rate      | Events        | PYs      | Rate      | Ratio                                | Adjusted HR | 95% CI    | P    |
| <b>Total</b>            | 1,404     | 22899.15  | 6,131.23  | 164           | 2744.86  | 5,974.81  | 1.03                                 | 0.99        | 0.84-1.16 | 0.88 |
| <b>Gender</b>           |           |           |           |               |          |           |                                      |             |           |      |
| Male                    | 354       | 4,193.42  | 8,441.80  | 45            | 533.95   | 8,427.68  | 1.00                                 | 0.92        | 0.67-1.26 | 0.59 |
| Female                  | 1,050     | 18,705.73 | 5,613.25  | 119           | 2210.9   | 5,382.42  | 1.04                                 | 1.02        | 0.84-1.23 | 0.87 |
| <b>Age groups (yrs)</b> |           |           |           |               |          |           |                                      |             |           |      |
| 20-39                   | 125       | 4,476.06  | 2,792.64  | 14            | 556.83   | 2,514.23  | 1.11                                 | 1.18        | 0.67-2.08 | 0.57 |
| 40-59                   | 484       | 10,274.88 | 4,710.52  | 54            | 1246.86  | 4,330.86  | 1.09                                 | 1.08        | 0.81-1.43 | 0.61 |
| 60-79                   | 589       | 6,787.74  | 8,677.41  | 72            | 774.719  | 9,293.69  | 0.93                                 | 0.90        | 0.71-1.16 | 0.43 |
| ≥80                     | 206       | 1,360.47  | 15,141.79 | 24            | 166.443  | 14,419.33 | 1.05                                 | 1.03        | 0.66-1.60 | 0.89 |
| <b>DM</b>               |           |           |           |               |          |           |                                      |             |           |      |
| Without                 | 1,138     | 20,145.62 | 5,648.87  | 138           | 2477.31  | 5,570.56  | 1.01                                 | 0.98        | 0.82-1.17 | 0.83 |
| With                    | 266       | 2,753.53  | 9,660.32  | 26            | 267.549  | 9,717.85  | 0.99                                 | 1.00        | 0.66-1.52 | 1.00 |
| <b>CKD</b>              |           |           |           |               |          |           |                                      |             |           |      |
| Without                 | 1,306     | 22,315.13 | 5,852.53  | 156           | 2675.02  | 5,831.73  | 1.00                                 | 0.97        | 0.82-1.15 | 0.73 |
| With                    | 98        | 584.02    | 16,780.33 | 8             | 69.8361  | 11,455.40 | 1.46                                 | 1.90        | 0.79-4.60 | 0.15 |
| <b>Hyperlipidemia</b>   |           |           |           |               |          |           |                                      |             |           |      |
| Without                 | 1,321     | 22,075.17 | 5,984.10  | 157           | 2690.23  | 5,835.92  | 1.03                                 | 1.00        | 0.84-1.18 | 0.96 |
| With                    | 83        | 823.97    | 10,073.13 | 7             | 54.62    | 12,815.07 | 0.79                                 | 0.81        | 0.33-1.97 | 0.64 |
| <b>Year</b>             |           |           |           |               |          |           |                                      |             |           |      |
| 2000-2008               | 845       | 13,875.12 | 6,090.04  | 84            | 1,526.21 | 5,503.81  | 1.11                                 | 1.06        | 0.90-1.26 | 0.80 |
| 2009-2015               | 559       | 9,024.02  | 6,194.58  | 80            | 1,218.64 | 6,564.68  | 0.94                                 | 0.91        | 0.77-1.07 | 0.89 |

P: Chi-square / Fisher exact test on category variables and t-test on continue variables

RAI=radioactive iodine; CVD=cardiovascular disease; DM=diabetes mellitus; CKD=chronic kidney disease;

PYs=person-years; Rate=per 100000 person-years; Adjusted Hazard ratio=adjusted for the variables listed in Table

2; HR=hazard ratio; CI=confidence interval;

**Table S4.** Factors of CVD-specific mortality stratified by variables listed in the table by using Cox regression

|                         | RAI group |           |         | Non-RAI group |          |          | RAI vs. non-RAI ( <i>Reference</i> ) |             |           |      |
|-------------------------|-----------|-----------|---------|---------------|----------|----------|--------------------------------------|-------------|-----------|------|
| Stratified              | Events    | PYs       | Rate    | Events        | PYs      | Rate     | Ratio                                | Adjusted HR | 95% CI    | P    |
| <b>Total</b>            | 209       | 25642.17  | 815.06  | 28            | 3058.93  | 915.35   | 0.89                                 | 0.92        | 0.62-1.37 | 0.68 |
| <b>Gender</b>           |           |           |         |               |          |          |                                      |             |           |      |
| Male                    | 56        | 4844.64   | 1155.92 | 8             | 608.81   | 1314.03  | 0.88                                 | 0.80        | 0.37-1.70 | 0.56 |
| Female                  | 153       | 20797.53  | 735.66  | 20            | 2450.12  | 816.29   | 0.90                                 | 0.93        | 0.58-1.50 | 0.78 |
| <b>Age groups (yrs)</b> |           |           |         |               |          |          |                                      |             |           |      |
| 20-39                   | 6         | 4654.19   | 128.92  | 0             | 580.94   | 0.00     | ∞                                    | ∞           | -         | 0.96 |
| 40-59                   | 32        | 11180.73  | 286.21  | 5             | 1341.64  | 372.68   | 0.77                                 | 0.82        | 0.31-2.14 | 0.68 |
| 60-79                   | 94        | 8039.29   | 1169.26 | 14            | 910.42   | 1537.75  | 0.76                                 | 0.78        | 0.44-1.38 | 0.39 |
| ≥80                     | 77        | 1767.96   | 4355.30 | 9             | 225.93   | 3983.55  | 1.09                                 | 1.36        | 0.67-2.79 | 0.40 |
| <b>DM</b>               |           |           |         |               |          |          |                                      |             |           |      |
| Without                 | 179       | 22280.04  | 803.41  | 25            | 2725.61  | 917.23   | 0.88                                 | 0.85        | 0.56-1.30 | 0.46 |
| With                    | 30        | 3362.13   | 892.29  | 3             | 333.32   | 900.03   | 0.99                                 | 1.14        | 0.28-4.66 | 0.85 |
| <b>CKD</b>              |           |           |         |               |          |          |                                      |             |           |      |
| Without                 | 171       | 24890.79  | 687.00  | 25            | 2980.98  | 838.65   | 0.82                                 | 0.87        | 0.57-1.33 | 0.51 |
| With                    | 38        | 751.38    | 5057.35 | 3             | 77.95    | 3848.64  | 1.31                                 | 2.10        | 0.47-9.44 | 0.33 |
| <b>Hyperlipidemia</b>   |           |           |         |               |          |          |                                      |             |           |      |
| Without                 | 208       | 24703.86  | 841.97  | 28            | 2998.96  | 933.66   | 0.90                                 | 0.92        | 0.62-1.37 | 0.68 |
| With                    | 1         | 938.32    | 106.57  | 0             | 59.97    | 0.00     | ∞                                    | ∞           | -         | 0.98 |
| <b>Year</b>             |           |           |         |               |          |          |                                      |             |           |      |
| 2000-2008               | 121       | 14,975.25 | 808.00  | 14            | 1,698.29 | 824.36   | 0.98                                 | 1.01        | 0.68-1.51 | 0.61 |
| 2009-2015               | 88        | 10,666.92 | 824.98  | 14            | 1,360.65 | 1,028.92 | 0.80                                 | 0.83        | 0.55-1.23 | 0.70 |

P: Chi-square / Fisher exact test on category variables and t-test on continue variables

RAI=radioactive iodine; CVD=cardiovascular disease; DM=diabetes mellitus; CKD=chronic kidney disease;

PYs=person-years; Rate=per 100000 person-years; Adjusted Hazard ratio=adjusted for the variables listed in Table

2; HR=hazard ratio; CI=confidence interval;
